# Supplementary material for: An integrative bioinformatics analysis of microarray data for identifying hub genes as diagnostic biomarkers of preeclampsia
Source: PubMed Central journal article supplement (PMC6722495; doi:10.1042/bsr20190187), 2019-09-03

## Supplementary Information

### Supplementary Table Legends

**Supplementary Table 1.** Go functional enrichment analysis of DEGs.

**Supplementary Table 2.** KEGG pathway enrichment analysis of DEGs.

**Supplementary Table 3.** KEGG pathway enrichment analysis of each module.

**Supplementary Table 4.** The selection of hub genes based on MNC and MCC methods.

**Supplementary Table 5.** KEGG pathway enrichment analysis of 17 hub genes.

**Supplementary Table 6.** The primer sequences of IL17R, CD8A, CD3D, CD48, CCL2, LEP and  $\beta$ -actin.

### Supplementary Figure Legends

**Supplementary Figure 1. KEGG pathway enrichment analysis of 17 hub genes.** (A) The dot plot of KEGG pathway enrichment results. (B) The connections of hub genes and KEGG pathways.

**Supplementary Figure 2. Genes expression changes between PE and normal tissues.**

IL17R, CD8A, CD3D, CD48 and CCL2 mRNA expression levels were significantly downregulated in the placenta of patients with PE, and LEP mRNA level was upregulated using RT-qPCR. N = 5/group, \* p-value < 0.05, \*\* p-value < 0.01, \*\*\* p-value < 0.001 vs. NC and analyzed by Student's t-test.

A

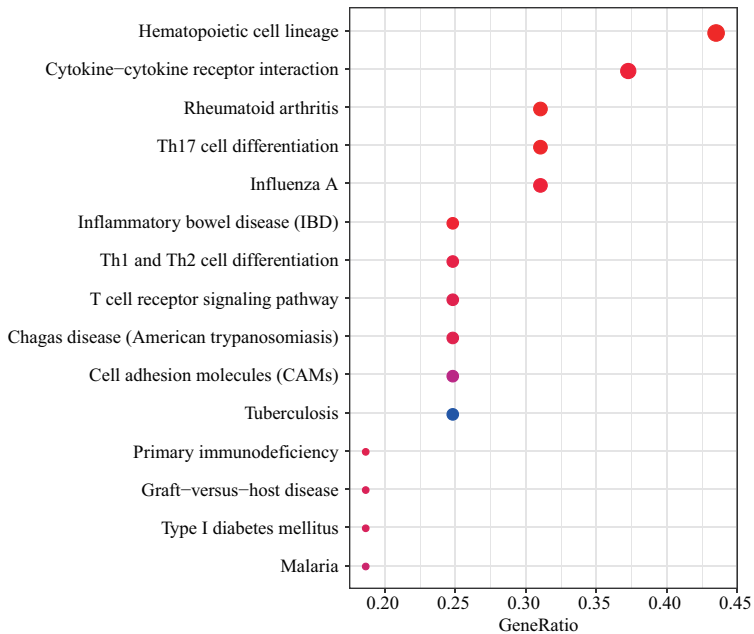

B

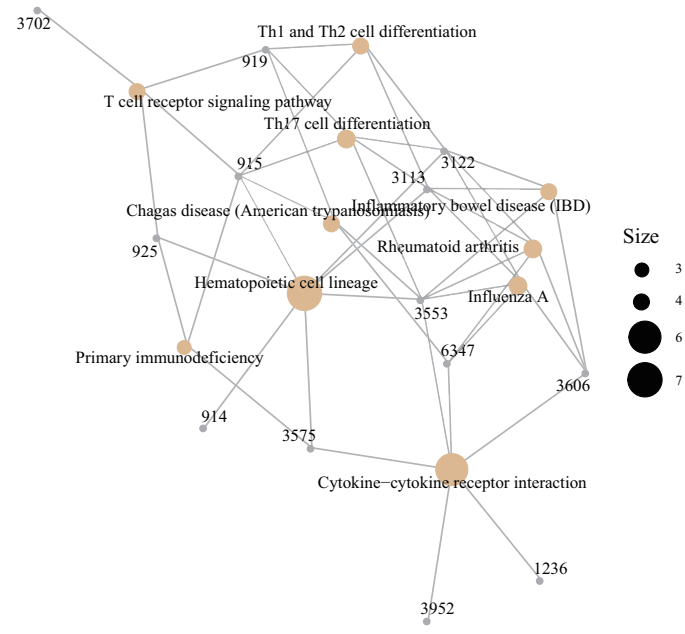

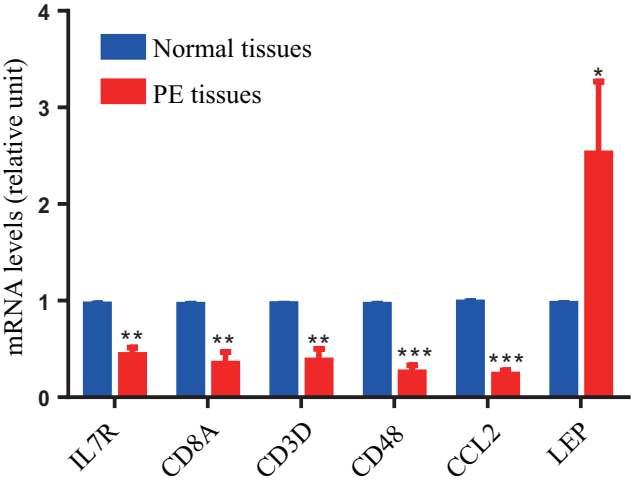

Supplement: bsr20190187_Supp1.pdf [file bsr20190187_Supp1.pdf]
